# Supplementary material for: The human fecal microbiome contributes to the biotransformation of the PFAS surfactant 8:2 monosubstituted polyfluoroalkyl phosphate ester
Source: Royal Society of Chemistry journal article supplement (doi:10.1039/d2em00225f), 2022-01-01
Supplement: d2em00225f1.pdf [file d2em00225f1.pdf]

## Supplemental Information

### The Human Fecal Microbiome Contributes to the Biotransformation of the PFAS Surfactant 8:2 Monosubstituted Polyfluoroalkyl Phosphate Ester

Sierra T. Peskett<sup>1</sup> and Amy A. Rand<sup>1</sup>

<sup>1</sup>Department of Chemistry and Institute of Biochemistry, Carleton University, 1125 Colonel By Drive, Ottawa, ON K1S 5B6

Email: amy.rand@carleton.ca

#### Table of Contents

|                                                                                                     |   |
|-----------------------------------------------------------------------------------------------------|---|
| <b>Table S1.</b> LC-MS/MS analyte mass transitions, cone and collision energies.....                | 2 |
| <b>Table S2.</b> Absolute recovery data for PFCA metabolites.....                                   | 3 |
| <b>Table S3.</b> Metabolites reported as percent dose from incubation of 6 $\mu$ M 8:2 monoPAP..... | 3 |

**Table S1.** LC-MS/MS analyte mass transitions, cone and collision energies

| Compound         | Precursor ion (m/z) | Product ion (m/z) | Cone energy (V) | Collision energy (V) |
|------------------|---------------------|-------------------|-----------------|----------------------|
| PFPeA            | 263.0               | 219.0             | 24              | 8                    |
| PFHxA            | 313.2               | 269.0             | 26              | 6                    |
| PFHpA            | 363.0               | 319.0             | 30              | 10                   |
| 7:2 sFTOH        | 393.0               | 219.0             | 20              | 14                   |
| PFOA             | 413.0               | 369.0             | 30              | 10                   |
| 7:2 Ketone       | 413.0               | 393.0             | 30              | 10                   |
| 7:3 u acid       | 439.0               | 395.0             | 30              | 20                   |
| 7:3 FTCA         | 441.0               | 337.0             | 15              | 10                   |
| 8:2 FTUCA        | 457.0               | 393.2             | 10              | 18                   |
| PFNA             | 463.0               | 219.2             | 30              | 15                   |
| 8:2 FTA          | 477.0               | 393.0             | 14              | 15                   |
| 8:2 monoPAP      | 543.1               | 97.2              | 16              | 20                   |
| 8:2 monoPAP_Qual | 543.1               | 523.0             | 16              | 20                   |

**Table S2.** Absolute recovery data for PFCA metabolites. Recovery values were obtained in triplicate after 1 hour incubation at 37°C in 100 mM phosphate buffer with the NADPH regeneration system.

|       | Average peak area of samples spiked before incubation | Peak area of samples spiked after incubation | Absolute Recovery (%) | Standard Error |
|-------|-------------------------------------------------------|----------------------------------------------|-----------------------|----------------|
| PFPeA | 1329                                                  | 1055                                         | 126                   | 21.1           |
| PFHpA | 8924                                                  | 7220                                         | 124                   | 5.9            |
| PFHxA | 5195                                                  | 3549                                         | 146                   | 13.6           |
| PFOA  | 2825                                                  | 2367                                         | 119                   | 7.6            |
| PFNA  | 64                                                    | 49                                           | 130                   | 16.8           |

**Table S3.** Metabolites reported as percent dose from incubation with NADPH and 6 µM 8:2 monoPAP.

|                    | Liver S9 | Intestine S9 | Fecal suspension |
|--------------------|----------|--------------|------------------|
| <b>1 min</b>       |          |              |                  |
| 8:2 FTOH           | 2.94%    | 3.83%        | 23.05%           |
| Oxidation Products | 1.34%    | 0.22%        | 0.02%            |
| Total              | 4.29%    | 4.06%        | 23.07%           |
| <b>5 min</b>       |          |              |                  |
| 8:2 FTOH           | 2.15%    | 4.38%        | 26.02%           |
| Oxidation Products | 3.53%    | 0.24%        | 0.13%            |
| Total              | 5.68%    | 4.62%        | 26.15%           |
| <b>10 min</b>      |          |              |                  |
| 8:2 FTOH           | 3.39%    | 15.22%       | 27.49%           |
| Oxidation Products | 3.78%    | 0.22%        | 0.19%            |
| Total              | 7.16%    | 15.45%       | 27.68%           |
| <b>30 min</b>      |          |              |                  |
| 8:2 FTOH           | 6.01%    | 25.48%       | 29.89%           |
| Oxidation Products | 4.26%    | 0.20%        | 0.20%            |
| Total              | 10.27%   | 25.67%       | 30.08%           |
| <b>60 min</b>      |          |              |                  |
| 8:2 FTOH           | 11.14%   | 26.28%       | 27.67%           |
| Oxidation Products | 7.03%    | 0.21%        | 0.21%            |
| Total              | 18.17%   | 26.50%       | 27.88%           |
| <b>120 min</b>     |          |              |                  |
| 8:2 FTOH           | 12.01%   | 30.65%       | 25.93%           |
| Oxidation Products | 7.20%    | 0.19%        | 0.21%            |
| Total              | 19.21%   | 30.84%       | 26.14%           |
